# Supplementary material for: An integrated approach for the systematic identification and characterization of heart-enriched genes with unknown functions
Source: PubMed Central journal article supplement (PMC2657154; doi:10.1186/1471-2164-10-100), 2009-03-06
Supplement: 1471-2164-10-100-S1.pdf [file 1471-2164-10-100-S1.pdf]

| GO ID      | GO Term                                                                                                                          | Mouse        | p-value (Mouse) | Rat         | p-value (Rat) | Human       | p-value (Human) | Chicken    | p-value (Chicken) |
|------------|----------------------------------------------------------------------------------------------------------------------------------|--------------|-----------------|-------------|---------------|-------------|-----------------|------------|-------------------|
| GO:0007507 | heart development                                                                                                                | 34% (43/124) | 2,30E-07        | 28% (27/94) | 0,0007661     | 37% (23/61) | 4,58E-05        | 37% (6/16) | 0,03272           |
| GO:0003007 | heart morphogenesis                                                                                                              | 36% (8/22)   | 0,01662         | 0% (0/3)    | 1             | 37% (3/8)   | 0,1219          | 0% (0/0)   | 1                 |
| GO:0008016 | regulation of heart contraction                                                                                                  | 40% (8/20)   | 0,01084         | 37% (11/29) | 0,004159      | 55% (15/27) | 3,37E-05        | 0% (0/1)   | 1                 |
| GO:0001947 | heart looping                                                                                                                    | 35% (5/14)   | 0,05724         | 40% (4/10)  | 0,06645       | 33% (3/9)   | 0,1494          | 33% (1/3)  | 0,3842            |
| GO:0035050 | embryonic heart tube development                                                                                                 | 45% (5/11)   | 0,02864         | 33% (2/6)   | 0,2298        | 42% (3/7)   | 0,09652         | 66% (2/3)  | 0,103             |
| GO:0007512 | adult heart development                                                                                                          | 70% (7/10)   | 0,00172         | 77% (7/9)   | 0,001122      | 57% (4/7)   | 0,02887         | 66% (2/3)  | 0,103             |
| GO:0002026 | regulation of the force of heart contraction                                                                                     | 50% (5/10)   | 0,02168         | 50% (3/6)   | 0,07361       | 40% (2/5)   | 0,1857          | 0% (0/1)   | 1                 |
| GO:0048738 | cardiac muscle development                                                                                                       | 71% (5/7)    | 0,007652        | 100% (3/3)  | 0,02275       | 50% (3/6)   | 0,07361         | 66% (2/3)  | 0,103             |
| GO:0060048 | cardiac muscle contraction                                                                                                       | 57% (4/7)    | 0,02887         | 88% (8/9)   | 0,0002668     | 66% (2/3)   | 0,103           | 0% (0/0)   | 1                 |
| GO:0002027 | regulation of heart rate                                                                                                         | 33% (2/6)    | 0,2298          | 50% (2/4)   | 0,1431        | 66% (2/3)   | 0,103           | 0% (0/0)   | 1                 |
| GO:0055007 | cardiac muscle cell differentiation                                                                                              | 60% (3/5)    | 0,0535          | 66% (2/3)   | 0,103         | 66% (2/3)   | 0,103           | 100% (1/1) | 0,2152            |
| GO:0055010 | ventricular cardiac muscle morphogenesis                                                                                         | 60% (3/5)    | 0,0535          | 83% (5/6)   | 0,004922      | 71% (5/7)   | 0,007652        | 0% (0/0)   | 1                 |
| GO:0060038 | cardiac muscle cell proliferation                                                                                                | 40% (2/5)    | 0,1857          | 0% (0/1)    | 1             | 50% (2/4)   | 0,1431          | 0% (0/1)   | 1                 |
| GO:0055003 | cardiac myofibril assembly                                                                                                       | 100% (4/4)   | 0,008105        | 66% (2/3)   | 0,103         | 100% (1/1)  | 0,2152          | 100% (2/2) | 0,008105          |
| GO:0045822 | negative regulation of heart contraction                                                                                         | 50% (2/4)    | 0,1431          | 40% (2/5)   | 0,1857        | 50% (1/2)   | 0,3048          | 0% (0/1)   | 1                 |
| GO:0055012 | ventricular cardiac muscle cell differentiation                                                                                  | 0% (0/4)     | 1               | 0% (0/1)    | 1             | 0% (0/0)    | 1               | 0% (0/0)   | 1                 |
| GO:0001996 | positive regulation of heart rate by epinephrine-norepinephrine                                                                  | 66% (2/3)    | 0,103           | 66% (2/3)   | 0,103         | 50% (1/2)   | 0,3048          | 0% (0/0)   | 1                 |
| GO:0001997 | positive regulation of the force of heart contraction by epinephrine-norepinephrine                                              | 66% (2/3)    | 0,103           | 66% (2/3)   | 0,103         | 50% (1/2)   | 0,3048          | 0% (0/0)   | 1                 |
| GO:0060047 | heart contraction                                                                                                                | 66% (2/3)    | 0,103           | 100% (1/1)  | 0,2152        | 100% (2/2)  | 0,06675         | 0% (0/0)   | 1                 |
| GO:0035051 | cardiac cell differentiation                                                                                                     | 33% (1/3)    | 0,3842          | 50% (1/2)   | 0,3048        | 100% (1/1)  | 0,2152          | 0% (0/0)   | 1                 |
| GO:0060045 | positive regulation of cardiac muscle cell proliferation                                                                         | 0% (0/3)     | 1               | 0% (0/1)    | 1             | 0% (0/1)    | 1               | 0% (0/0)   | 1                 |
| GO:0048739 | cardiac muscle fiber development                                                                                                 | 100% (2/2)   | 0,06675         | 100% (1/1)  | 0,2152        | 100% (1/1)  | 0,2152          | 100% (1/1) | 0,2152            |
| GO:0035054 | embryonic heart tube anterior/posterior pattern formation                                                                        | 50% (1/2)    | 0,3048          | 50% (1/2)   | 0,3048        | 0% (0/0)    | 1               | 100% (1/1) | 0,2152            |
| GO:0055015 | ventricular cardiac muscle cell development                                                                                      | 50% (1/2)    | 0,3048          | 100% (1/1)  | 0,2152        | 0% (0/0)    | 1               | 0% (0/0)   | 1                 |
| GO:0001985 | negative regulation of heart rate in baroreceptor response to increased systemic arterial blood pressure                         | 100% (1/1)   | 0,2152          | 100% (1/1)  | 0,2152        | 0% (0/0)    | 1               | 0% (0/0)   | 1                 |
| GO:0055008 | cardiac muscle morphogenesis                                                                                                     | 100% (1/1)   | 0,2152          | 50% (1/2)   | 0,3048        | 100% (1/1)  | 0,2152          | 100% (2/2) | 0,06675           |
| GO:0055009 | atrial cardiac muscle morphogenesis                                                                                              | 100% (1/1)   | 0,2152          | 100% (1/1)  | 0,2152        | 100% (1/1)  | 0,2152          | 100% (1/1) | 0,2152            |
| GO:0055013 | cardiac muscle cell development                                                                                                  | 100% (1/1)   | 0,2152          | 0% (0/0)    | 1             | 0% (0/0)    | 1               | 0% (0/0)   | 1                 |
| GO:0001986 | negative regulation of the force of heart contraction during baroreceptor response to increased systemic arterial blood pressure | 0% (0/1)     | 1               | 0% (0/1)    | 1             | 0% (0/1)    | 1               | 0% (0/0)   | 1                 |
| GO:0001988 | positive regulation of heart rate in baroreceptor response to decreased systemic arterial blood pressure                         | 0% (0/1)     | 1               | 0% (0/0)    | 1             | 0% (0/1)    | 1               | 0% (0/1)   | 1                 |
| GO:0045823 | positive regulation of heart contraction                                                                                         | 0% (0/1)     | 1               | 0% (0/2)    | 1             | 0% (0/2)    | 1               | 0% (0/1)   | 1                 |
| GO:0060044 | negative regulation of cardiac muscle cell proliferation                                                                         | 0% (0/0)     | 1               | 50% (1/2)   | 0,3048        | 100% (1/1)  | 0,2152          | 100% (1/1) | 0,2152            |
