# Supplementary material for: An integrated approach for the systematic identification and characterization of heart-enriched genes with unknown functions
Source: PubMed Central journal article supplement (PMC2657154; doi:10.1186/1471-2164-10-100), 2009-03-06
Supplement: 1471-2164-10-100-S5.pdf [file 1471-2164-10-100-S5.pdf]

| <b>Database Name</b>            | <b>FTP Site</b>                                                                                                 | <b>Date of Data Retrieval</b> | <b>Note (e.g. version)</b> |
|---------------------------------|-----------------------------------------------------------------------------------------------------------------|-------------------------------|----------------------------|
| Entrez Gene                     | <a href="ftp://ftp.ncbi.nih.gov/gene/">ftp://ftp.ncbi.nih.gov/gene/</a>                                         | 10/4/2007                     |                            |
| HomoloGene                      | <a href="ftp://ftp.ncbi.nih.gov/pub/HomoloGene/">ftp://ftp.ncbi.nih.gov/pub/HomoloGene/</a>                     | 10/4/2007                     | build57                    |
| Mouse Genome Informatics (MGI)  | <a href="ftp://ftp.informatics.jax.org/">ftp://ftp.informatics.jax.org/</a>                                     | 10/9/2007                     |                            |
| UniGene                         | <a href="ftp://ftp.ncbi.nih.gov/repository/UniGene/">ftp://ftp.ncbi.nih.gov/repository/UniGene/</a>             | 10/4/2007                     |                            |
| Medical Subject Headings (MeSH) | <a href="http://www.ncbi.nlm.nih.gov/sites/entrez?db=mesh">http://www.ncbi.nlm.nih.gov/sites/entrez?db=mesh</a> | 12/8/2007                     |                            |
