# Supplementary material for: An integrated approach for the systematic identification and characterization of heart-enriched genes with unknown functions
Source: BMC Genomics. 2009 Mar 6;10:100. doi: 10.1186/1471-2164-10-100 (PMC2657154; doi:10.1186/1471-2164-10-100)
Supplement: Additional file 2 — Combinatorial GO annotations of mouse genes categorized under "heart development". 43 genes that are categorized under "heart development (GO:0007507)" were obtained. Gene symbols, GeneIDs, and combinations of organisms, in which they were selected, are indicated. [file 1471-2164-10-100-S2.pdf]

| Symbol        | Mouse<br>GeneID | Mouse Rat | Mouse<br>Human | Mouse Chic | Rat Human | Rat Chick | Human Chick | Mouse Rat<br>Human | Mouse Rat<br>Chick | Mouse<br>Human Chick | Rat Human<br>Chick | Mouse Rat<br>Human Chick |
|---------------|-----------------|-----------|----------------|------------|-----------|-----------|-------------|--------------------|--------------------|----------------------|--------------------|--------------------------|
| <i>Acadm</i>  | 11364           | Yes       | Yes            | No         | Yes       | No        | No          | Yes                | No                 | No                   | No                 | No                       |
| <i>Acvr1</i>  | 11477           | No        | Yes            | No         | No        | No        | No          | No                 | No                 | No                   | No                 | No                       |
| <i>Acvr2b</i> | 11481           | No        | Yes            | No         | No        | No        | No          | No                 | No                 | No                   | No                 | No                       |
| <i>Adam19</i> | 11492           | No        | No             | No         | Yes       | No        | No          | No                 | No                 | No                   | No                 | No                       |
| <i>Alpk3</i>  | 116904          | Yes       | Yes            | Yes        | Yes       | Yes       | Yes         | Yes                | Yes                | Yes                  | Yes                | Yes                      |
| <i>Bmp10</i>  | 12154           | Yes       | No             | No         | No        | No        | No          | No                 | No                 | No                   | No                 | No                       |
| <i>Smyd1</i>  | 12180           | Yes       | Yes            | Yes        | Yes       | Yes       | Yes         | Yes                | Yes                | Yes                  | Yes                | Yes                      |
| <i>Casq2</i>  | 12373           | Yes       | Yes            | Yes        | Yes       | Yes       | Yes         | Yes                | Yes                | Yes                  | Yes                | Yes                      |
| <i>Vcan</i>   | 13003           | No        | No             | No         | Yes       | No        | No          | No                 | No                 | No                   | No                 | No                       |
| <i>Cxadr</i>  | 13052           | No        | No             | No         | No        | Yes       | No          | No                 | No                 | No                   | No                 | No                       |
| <i>Ednra</i>  | 13617           | Yes       | Yes            | Yes        | Yes       | Yes       | Yes         | Yes                | Yes                | Yes                  | Yes                | Yes                      |
| <i>Eng</i>    | 13805           | No        | Yes            | No         | No        | No        | No          | No                 | No                 | No                   | No                 | No                       |
| <i>ErbB2</i>  | 13866           | Yes       | No             | No         | No        | No        | No          | No                 | No                 | No                   | No                 | No                       |
| <i>Gata4</i>  | 14463           | Yes       | Yes            | No         | Yes       | No        | No          | Yes                | No                 | No                   | No                 | No                       |
| <i>Gja7</i>   | 14615           | No        | Yes            | No         | No        | No        | No          | No                 | No                 | No                   | No                 | No                       |
| <i>Gli2</i>   | 14633           | No        | No             | No         | Yes       | No        | No          | No                 | No                 | No                   | No                 | No                       |
| <i>Gli3</i>   | 14634           | No        | No             | No         | No        | No        | Yes         | No                 | No                 | No                   | No                 | No                       |
| <i>Gys1</i>   | 14936           | Yes       | No             | No         | No        | No        | No          | No                 | No                 | No                   | No                 | No                       |
| <i>Hand1</i>  | 15110           | Yes       | No             | No         | No        | No        | No          | No                 | No                 | No                   | No                 | No                       |
| <i>Hand2</i>  | 15111           | No        | No             | No         | No        | Yes       | No          | No                 | No                 | No                   | No                 | No                       |
| <i>Id2</i>    | 15902           | No        | No             | No         | No        | No        | Yes         | No                 | No                 | No                   | No                 | No                       |
| <i>Kcnj8</i>  | 16523           | No        | Yes            | No         | No        | No        | No          | No                 | No                 | No                   | No                 | No                       |
| <i>Mb</i>     | 17189           | Yes       | Yes            | Yes        | Yes       | Yes       | Yes         | Yes                | Yes                | Yes                  | Yes                | Yes                      |
| <i>Mei2c</i>  | 17260           | No        | Yes            | No         | No        | No        | No          | No                 | No                 | No                   | No                 | No                       |
| <i>Foxc1</i>  | 17300           | No        | Yes            | No         | No        | No        | No          | No                 | No                 | No                   | No                 | No                       |
| <i>Msx2</i>   | 17702           | No        | No             | No         | Yes       | No        | No          | No                 | No                 | No                   | No                 | No                       |
| <i>Myl2</i>   | 17906           | Yes       | Yes            | Yes        | Yes       | Yes       | Yes         | Yes                | Yes                | Yes                  | Yes                | Yes                      |
| <i>Nf1</i>    | 18015           | No        | No             | Yes        | No        | No        | No          | No                 | No                 | No                   | No                 | No                       |
| <i>Nfatc1</i> | 18018           | No        | Yes            | No         | No        | No        | No          | No                 | No                 | No                   | No                 | No                       |
| <i>Nkx2-5</i> | 18091           | Yes       | Yes            | No         | Yes       | No        | No          | Yes                | No                 | No                   | No                 | No                       |
| <i>Nrp1</i>   | 18186           | No        | No             | Yes        | No        | No        | No          | No                 | No                 | No                   | No                 | No                       |
| <i>Srf</i>    | 20807           | Yes       | No             | No         | No        | No        | No          | No                 | No                 | No                   | No                 | No                       |
| <i>Tbx5</i>   | 21388           | No        | Yes            | Yes        | No        | No        | Yes         | No                 | No                 | Yes                  | No                 | No                       |
| <i>Myocd</i>  | 214384          | Yes       | Yes            | No         | Yes       | No        | No          | Yes                | No                 | No                   | No                 | No                       |
| <i>Tead1</i>  | 21676           | No        | No             | No         | Yes       | No        | No          | No                 | No                 | No                   | No                 | No                       |
| <i>Tnni3</i>  | 21954           | Yes       | No             | No         | No        | No        | No          | No                 | No                 | No                   | No                 | No                       |
| <i>Tnnt2</i>  | 21956           | Yes       | Yes            | Yes        | Yes       | Yes       | Yes         | Yes                | Yes                | Yes                  | Yes                | Yes                      |
| <i>Mib1</i>   | 225164          | No        | Yes            | No         | No        | No        | No          | No                 | No                 | No                   | No                 | No                       |
| <i>Zfpn2</i>  | 22762           | No        | No             | No         | Yes       | No        | No          | No                 | No                 | No                   | No                 | No                       |
| <i>Txnrd2</i> | 26462           | Yes       | No             | Yes        | No        | Yes       | No          | No                 | Yes                | No                   | No                 | No                       |
| <i>Irx4</i>   | 50916           | Yes       | No             | Yes        | No        | Yes       | No          | No                 | Yes                | No                   | No                 | No                       |
| <i>Pkp2</i>   | 67451           | Yes       | Yes            | Yes        | Yes       | Yes       | Yes         | Yes                | Yes                | Yes                  | Yes                | Yes                      |
| <i>Hopx</i>   | 74318           | No        | No             | Yes        | No        | No        | No          | No                 | No                 | No                   | No                 | No                       |
